# Supplementary material for: Dynamic postural control and physical stress: an approach to determining injury risk in real sporting conditions
Source: Springer Nature journal article supplement (doi:10.1007/s12662-022-00833-y), 2022-06-22
Supplement: MOESM1 [file 23194826]

## Supplementary Tables

**Table S1.** Reliability analysis (Pre01, Pre02, Pre03)

|     |              | ICC (3,1) |                   | SEM (SD × √1-ICC) | CV (SD/mean) × 100 |
|-----|--------------|-----------|-------------------|-------------------|--------------------|
| ANT | Kicking leg  | .96       | 95% CI [.95, .97] | 0.34              | 2.85               |
|     | Standing leg | .96       | 95% CI [.94, .97] | 0.34              | 2.66               |
| PM  | Kicking leg  | .96       | 95% CI [.94, .97] | 0.48              | 2.25               |
|     | Standing leg | .94       | 95% CI [.91, .95] | 0.77              | 3.17               |
| PL  | Kicking leg  | .94       | 95% CI [.92, .95] | 0.67              | 2.64               |
|     | Standing leg | .91       | 95% CI [.87, .93] | 0.78              | 2.57               |

ANT = anterior; CI = confidence interval; CV = coefficient of variation; ICC = intraclass correlation coefficient; PM = posteromedial; PL = posterolateral; SD = standard deviation; SEM = standard error of measurement

**Table S2.** Mean composite scores (CS) for both groups

|                         |                   | pre03                                   | post01       | post02        | post03         |                |
|-------------------------|-------------------|-----------------------------------------|--------------|---------------|----------------|----------------|
| Cycling Group           | kicking leg       | M ± SD                                  | 88.66 ± 6.40 | 85.01 ± 7.28  | 86.84 ± 6.38   | 87.73 ± 6.64   |
|                         |                   | d <sub>z</sub> <sup>1</sup>             |              | 0.67          | -0.45          | -0.30          |
|                         |                   | [95% CI]                                |              | [0.39, 0.94]  | [-0.71, -0.19] | [-0.55, -0.05] |
|                         |                   | Average change <sup>2</sup><br>(M ± SD) |              | 3.66 ± 5.49   | 1.82 ± 3.98    | 0.93 ± 3.56    |
|                         |                   | Change (%) <sup>2</sup>                 |              | -4.13         | -2.05          | -1.05          |
|                         |                   | MDC <sub>90</sub>                       |              | 2.58          |                |                |
|                         | standing leg      | M ± SD                                  | 89.43 ± 6.43 | 85.66 ± 6.48  | 87.08 ± 6.55   | 87.97 ± 6.44   |
|                         |                   | d <sub>z</sub> <sup>1</sup>             |              | 0.71          | -0.44          | -0.32          |
|                         |                   | [95% CI]                                |              | [0.43, 0.98]  | [-0.69, -0.18] | [-0.57, -0.06] |
|                         |                   | Average change <sup>2</sup><br>(M ± SD) |              | 3.76 ± 5.33   | 2.35 ± 4.18    | 1.46 ± 3.68    |
| Change (%) <sup>2</sup> |                   |                                         | -4.21        | -2.62         | -1.63          |                |
|                         | MDC <sub>90</sub> |                                         | 2.59         |               |                |                |
| Running Group           | kicking leg       | M ± SD                                  | 92.36 ± 7.98 | 91.89 ± 8.22  | 91.34 ± 8.73   | 92.06 ± 8.11   |
|                         |                   | d <sub>z</sub> <sup>1</sup>             |              | 0.16          | 0.22           | -0.28          |
|                         |                   | [95% CI]                                |              | [-0.09, 0.41] | [-0.03, 0.47]  | [-0.52, -0.03] |
|                         |                   | Average change <sup>2</sup><br>(M ± SD) |              | 0.47 ± 2.90   | 1.02 ± 3.38    | 0.30 ± 3.07    |
|                         |                   | Change (%) <sup>2</sup>                 |              | -0.50         | -1.10          | -0.33          |
|                         |                   | MDC <sub>90</sub>                       |              | 1.86          |                |                |
|                         | standing leg      | M ± SD                                  | 92.75 ± 8.97 | 91.74 ± 9.59  | 91.70 ± 9.17   | 92.59 ± 8.98   |
|                         |                   | d <sub>z</sub> <sup>1</sup>             |              | 0.29          | 0.02           | -0.45          |
|                         |                   | [95% CI]                                |              | [0.04, 0.54]  | [-0.23, 0.26]  | [-0.71, -0.19] |
|                         |                   | Average change <sup>2</sup><br>(M ± SD) |              | 1.01 ± 3.44   | 1.05 ± 2.50    | 0.16 ± 2.90    |
| Change (%) <sup>2</sup> |                   |                                         | -1.08        | -1.13         | -0.17          |                |
|                         | MDC <sub>90</sub> |                                         | 2.95         |               |                |                |

CI = confidence interval; CS = composite score; MDC = minimal detectable change, pre03 = pre-load; post01 = 0 min post-load; post02 = 10 min post load; post03 = 20 min post load.

<sup>1</sup> Compared to the previous point of time; <sup>2</sup> compared to pre03.

**Table S3.** Results of the contrast analysis for the CS of both groups

|                |                 | <b>Between</b> |         | <b>F (1, 63)</b> | <b>p</b> | <b><math>\eta^2_p</math></b> | <b>1-<math>\beta</math></b> |       |
|----------------|-----------------|----------------|---------|------------------|----------|------------------------------|-----------------------------|-------|
| <b>Cycling</b> | Kicking<br>leg  | Contrast 1     | Pre03   | Post01           | 28.44    | < .001                       | .31                         | > .99 |
|                |                 | Contrast 2     | Post 01 | Post02           | 13.17    | .001                         | .17                         | .95   |
|                |                 | Contrast 3     | Post02  | Post03           | 5.82     | .02                          | .09                         | .66   |
|                |                 | Contrast 4     | Pre03   | Post03           | 4.42     | .04                          | .07                         | .54   |
|                | Standing<br>leg | Contrast 1     | Pre03   | Post01           | 31.92    | < .001                       | .34                         | > .99 |
|                |                 | Contrast 2     | Post 01 | Post02           | 12.23    | .001                         | .16                         | .93   |
|                |                 | Contrast 3     | Post02  | Post03           | 6.39     | .01                          | .09                         | .70   |
|                |                 | Contrast 4     | Pre03   | Post03           | 10.03    | < .01                        | .14                         | .88   |
| <b>Running</b> | Kicking<br>leg  | Contrast 1     | Pre03   | Post01           | 1.65     | .20                          | .03                         | .25   |
|                |                 | Contrast 2     | Post 01 | Post02           | 3.14     | .08                          | .05                         | .42   |
|                |                 | Contrast 3     | Post02  | Post03           | 4.96     | .03                          | .07                         | .59   |
|                |                 | Contrast 4     | Pre03   | Post03           | 0.61     | .44                          | .01                         | .12   |
|                | Standing<br>leg | Contrast 1     | Pre03   | Post01           | 5.47     | .02                          | .08                         | .63   |
|                |                 | Contrast 2     | Post 01 | Post02           | .02      | .90                          | < .001                      | .05   |
|                |                 | Contrast 3     | Post02  | Post03           | 12.97    | < .01                        | .17                         | .94   |
|                |                 | Contrast 4     | Pre03   | Post03           | 0.20     | .66                          | < .01                       | .07   |

pre03 = pre-load; post01 = 0 min post-load; post02 = 10 min post-load; post03 = 20 min post-load.
